# Supplementary material for: Overexpression of ABCB1 Transporter Confers Resistance to mTOR Inhibitor WYE-354 in Cancer Cells
Source: PubMed Central journal article supplement (PMC7073023; doi:10.3390/ijms21041387), 2020-02-19
Supplement: ijms-21-01387-s001.pdf [file ijms-21-01387-s001.pdf]

## Supplemental data

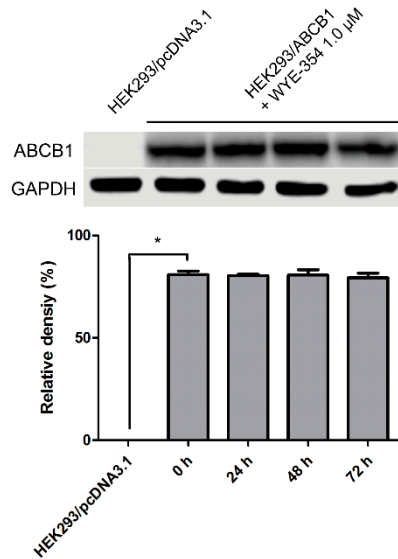

Western blotting on the expression level of ABCB1 in the HEK293/ABCB1 cells incubated with 1.0  $\mu$ M WYE-354. Image J was used to quantify the relative density of each band. \* $p < 0.05$ , compared with the control group. Like KB-C2 cells, the expression of ABCB1 in HEK293/ABCB1 was not significantly change after the treatment of WYE-354 for 72 h
